# Supplementary material for: Patients with metastatic renal cell carcinoma who benefit from axitinib dose titration: analysis from a randomised, double-blind phase II study
Source: PubMed Central journal article supplement (PMC6322336; doi:10.1186/s12885-018-5224-6), 2019-01-07
Supplement: 12885_2018_5224_MOESM1_ESM.pdf [file 12885_2018_5224_MOESM1_ESM.pdf]

**Additional file 1.** Baseline characteristics of patients with OS  $\geq$ 24 versus  $<$ 24 months in the placebo titration arm

| Baseline Characteristics, <i>n</i> (%) |                | OS $\geq$ 24 months<br><i>n</i> = 30 | OS $<$ 24 months<br><i>n</i> = 20 <sup>a</sup> | <i>p</i> -value <sup>b</sup> |
|----------------------------------------|----------------|--------------------------------------|------------------------------------------------|------------------------------|
| Age, years                             | <65            | 19 (63)                              | 15 (75)                                        | 0.5382                       |
|                                        | $\geq$ 65      | 11 (37)                              | 5 (25)                                         |                              |
| Sex                                    | Male           | 25 (83)                              | 14 (70)                                        | 0.3109                       |
|                                        | Female         | 5 (17)                               | 6 (30)                                         |                              |
| Race                                   | White          | 26 (87)                              | 18 (90)                                        | 1.0000                       |
|                                        | Asian          | 3 (10)                               | 2 (10)                                         |                              |
|                                        | Other          | 1 (3)                                | 0                                              |                              |
| Weight, kg                             | $\leq$ 65      | 4 (13)                               | 6 (30)                                         | 0.2321                       |
|                                        | >65, $\leq$ 76 | 6 (20)                               | 5 (25)                                         |                              |
|                                        | >76, $\leq$ 89 | 12 (40)                              | 4 (20)                                         |                              |
|                                        | >89            | 8 (27)                               | 5 (25)                                         |                              |
| ECOG PS                                | 0              | 19 (63)                              | 10 (50)                                        | 0.3927                       |
|                                        | $\geq$ 1       | 11 (37)                              | 10 (50)                                        |                              |
| Histological classification            | Clear cell     | 30 (100)                             | 20 (100)                                       | NA                           |
|                                        | Other          | 0                                    | 0                                              |                              |
| Prior nephrectomy                      | Yes            | 22 (73)                              | 17 (85)                                        | 0.4895                       |
|                                        | No             | 8 (27)                               | 3 (15)                                         |                              |
| No. of metastatic sites                | $\leq$ 2       | 17 (57)                              | 7 (35)                                         | 0.1588                       |
|                                        | $\geq$ 3       | 13 (43)                              | 13 (65)                                        |                              |
| Site of metastasis                     | Lung only      | 4 (13)                               | 0                                              | 0.1400                       |
|                                        | Lung + others  | 26 (87)                              | 20 (100)                                       |                              |
| Site of metastasis, individual         |                |                                      |                                                |                              |
|                                        | Lung           | 20 (67)                              | 14 (70)                                        | 1.0000                       |
|                                        | Lymph node     | 14 (47)                              | 12 (60)                                        | 0.3991                       |
|                                        | Kidney         | 10 (33)                              | 5 (25)                                         | 0.7536                       |
|                                        | Liver          | 5 (17)                               | 8 (40)                                         | 0.1004                       |
|                                        | Adrenal        | 7 (23)                               | 7 (35)                                         | 0.5216                       |
|                                        | Bone           | 4 (13)                               | 7 (35)                                         | 0.0902                       |

|                                                        |            |         |         |        |
|--------------------------------------------------------|------------|---------|---------|--------|
|                                                        | Pancreas   | 0       | 0       | NA     |
| Time from histopathological diagnosis to treatment     |            |         |         |        |
|                                                        | ≥1 year    | 12 (40) | 5 (25)  | 0.3654 |
|                                                        | <1 year    | 18 (60) | 15 (75) |        |
| Time from metastatic diagnosis to treatment            |            |         |         |        |
|                                                        | ≥1 year    | 2 (7)   | 2 (10)  | 1.0000 |
|                                                        | <1 year    | 28 (93) | 18 (90) |        |
| Sum of longest diameter for target lesion <sup>c</sup> |            |         |         |        |
|                                                        | ≤Median    | 14 (48) | 7 (35)  | 0.3942 |
|                                                        | >Median    | 15 (52) | 13 (65) |        |
| Presence of metastases (de novo) at initial diagnosis  |            |         |         |        |
|                                                        | No         | 16 (53) | 6 (30)  | 0.1480 |
|                                                        | Yes        | 14 (47) | 14 (70) |        |
| Baseline LDH                                           | ≤1.5 × ULN | 28 (93) | 19 (95) | 1.0000 |
|                                                        | >1.5 × ULN | 2 (7)   | 1 (5)   |        |
| Baseline Hb                                            | ≥LLN       | 19 (63) | 12 (60) | 1.0000 |
|                                                        | <LLN       | 11 (37) | 8 (40)  |        |
| Baseline Neu                                           | ≤ULN       | 28 (93) | 15 (75) | 0.1003 |
|                                                        | >ULN       | 2 (7)   | 5 (25)  |        |
| Baseline Plt                                           | ≤ULN       | 29 (97) | 17 (85) | 0.2885 |
|                                                        | >ULN       | 1 (3)   | 3 (15)  |        |

*Abbreviations: ECOG PS Eastern Cooperative Oncology Group performance status, Hb*

*haemoglobin, LDH lactate dehydrogenase, LLN lower limit of normal, NA not applicable Neu*

*neutrophil, OS overall survival, Plt platelet, ULN upper limit of normal*

<sup>a</sup> Excluded 6 patients who were censored <24 months in OS.

<sup>b</sup> Fisher's exact test was used for all, except weight, for which Cochran-Armitage trend test was used.

<sup>c</sup> 1 patient in the OS≥24 months group did not have any measurable target lesion; hence, was not included in the analysis.
