# Supplementary material for: Patients with metastatic renal cell carcinoma who benefit from axitinib dose titration: analysis from a randomised, double-blind phase II study
Source: PubMed Central journal article supplement (PMC6322336; doi:10.1186/s12885-018-5224-6), 2019-01-07
Supplement: 12885_2018_5224_MOESM2_ESM.pdf [file 12885_2018_5224_MOESM2_ESM.pdf]

**Additional file 2.** Drug exposure in patients with OS  $\geq$ 24 versus  $<$ 24 months in the placebo titration arm

| Parameter                                              | OS $\geq$ 24 months<br><i>n</i> = 30 | OS $<$ 24 months<br><i>n</i> = 20 <sup>a</sup> |
|--------------------------------------------------------|--------------------------------------|------------------------------------------------|
| Days on treatment, <sup>b</sup> median (range)         | 677 (177–1554)                       | 171 (43–505)                                   |
| Days on drug, <sup>c</sup> median (range)              | 664 (167–1554)                       | 165 (43–484)                                   |
| Average daily dose, <sup>d</sup> median (range), mg    | 18.3 (7.4–19.8)                      | 13.8 (8.0–18.9)                                |
| Relative dose intensity, median (range), %             | 180 (65–198)                         | 135 (77–189)                                   |
| Patients with dose decrease $<$ 5 mg bid, <i>n</i> (%) | 3 (10)                               | 2 (10)                                         |

Abbreviations: *bid* twice daily, OS overall survival

<sup>a</sup> Excluded 6 patients who were censored  $<$ 24 months in OS.

<sup>b</sup> Time period starting from date of the first dose to date of the last dose or data cutoff.

<sup>c</sup> Total number of days in which axitinib was actually administered.

<sup>d</sup> Included placebo titration.
