# Supplementary material for: Patients with metastatic renal cell carcinoma who benefit from axitinib dose titration: analysis from a randomised, double-blind phase II study
Source: PubMed Central journal article supplement (PMC6322336; doi:10.1186/s12885-018-5224-6), 2019-01-07
Supplement: 12885_2018_5224_MOESM3_ESM.pdf [file 12885_2018_5224_MOESM3_ESM.pdf]

**Additional file 3.** Reasons for treatment discontinuation of patients with OS  $\geq 24$  versus  $< 24$  months in the placebo titration arm

| Reason for treatment discontinuation, <i>n</i> (%)                        | OS $\geq 24$ months<br><i>n</i> = 30 <sup>a</sup> | OS $< 24$ months<br><i>n</i> = 20 <sup>b</sup> |
|---------------------------------------------------------------------------|---------------------------------------------------|------------------------------------------------|
| Objective progression or relapse                                          | 22 (73)                                           | 14 (70)                                        |
| Adverse event                                                             | 2 (7)                                             | 3 (15)                                         |
| Death                                                                     | 1 (3)                                             | 0                                              |
| Global deterioration of health status                                     | 0                                                 | 1 (5)                                          |
| Patient refusal to continue treatment for reason other than adverse event | 2 (7)                                             | 1 (5)                                          |
| Others                                                                    | 2 (7)                                             | 1 (5)                                          |
| Total                                                                     | 29 (97)                                           | 20 (100)                                       |

*Abbreviation:* OS overall survival

<sup>a</sup> Including 1 patients still on treatment.

<sup>b</sup> Excluded 6 patients who were censored  $< 24$  months in OS.
