# Supplementary material for: Patients with metastatic renal cell carcinoma who benefit from axitinib dose titration: analysis from a randomised, double-blind phase II study
Source: PubMed Central journal article supplement (PMC6322336; doi:10.1186/s12885-018-5224-6), 2019-01-07
Supplement: 12885_2018_5224_MOESM5_ESM.pdf [file 12885_2018_5224_MOESM5_ESM.pdf]

**Additional file 5.** Multivariate analysis of patient baseline characteristics for the effect of interaction with axitinib titration on OS

| Parameter                                                                    | Titration                                      | Covariate                                      | Interaction                                    | HR for Covariate     |                                    |
|------------------------------------------------------------------------------|------------------------------------------------|------------------------------------------------|------------------------------------------------|----------------------|------------------------------------|
|                                                                              | HR<br>(95% CI)<br><i>p</i> -value <sup>a</sup> | HR<br>(95% CI)<br><i>p</i> -value <sup>a</sup> | HR<br>(95% CI)<br><i>p</i> -value <sup>a</sup> | Placebo<br>Titration | Axitinib<br>Titration <sup>b</sup> |
| Metastatic site<br>(≥3 vs. ≤2)                                               | 0.131<br>(0.034–0.510)<br><i>p</i> =0.0033     | 2.191<br>(1.145–4.193)<br><i>p</i> =0.0179     | 2.026<br>(0.636–6.449)<br><i>p</i> =0.2321     | 2.191                | 4.438                              |
| Time from<br>histopathological diagnosis<br>to treatment<br>(<1 vs. ≥1 year) |                                                | 1.437<br>(0.701–2.943)<br><i>p</i> =0.3218     | 2.484<br>(0.868–7.112)<br><i>p</i> =0.0900     | 1.437                | 3.569                              |
| Baseline Hb <LLN<br>(yes vs. no)                                             |                                                | 0.940<br>(0.484–1.823)<br><i>p</i> =0.8543     | 3.595<br>(1.315–9.824)<br><i>p</i> =0.0126     | 0.940                | 3.378                              |

Abbreviations: *CI* confidence interval, *Hb* haemoglobin, *HR* hazard ratio, *LLN* lower limit of normal

<sup>a</sup> *p*-values from 2-sided Wald test.

<sup>b</sup> Hazard ratio for each covariate in the axitinib titration arm is derived from the multiplicity of the covariate hazard ratio and the interaction hazard ratio.
