# Supplementary material for: Patients with metastatic renal cell carcinoma who benefit from axitinib dose titration: analysis from a randomised, double-blind phase II study
Source: BMC Cancer. 2019 Jan 7;19:17. doi: 10.1186/s12885-018-5224-6 (PMC6322336; doi:10.1186/s12885-018-5224-6)
Supplement: Supplementary file 4 — Table presenting “Common, all-causality adverse events reported in patients with OS ≥24 versus <24 months in the placebo titration arm.” (PDF 73 kb) [file 12885_2018_5224_MOESM4_ESM.pdf]

**Additional file 4.** Common, all-causality adverse events reported in patients with OS  $\geq 24$  versus  $< 24$  months in the placebo titration arm

| Adverse event, <sup>a</sup> n (%) | OS $\geq 24$ months, n = 30 |                | OS $< 24$ months, n = 20 <sup>b</sup> |                |
|-----------------------------------|-----------------------------|----------------|---------------------------------------|----------------|
|                                   | All Grades                  | Grade $\geq 3$ | All Grades                            | Grade $\geq 3$ |
| Any                               | 30 (100)                    | 14 (47)        | 17 (85)                               | 12 (60)        |
| Diarrhoea                         | 24 (80)                     | 3 (10)         | 8 (40)                                | 0              |
| Hypertension                      | 15 (50)                     | 3 (10)         | 7 (35)                                | 2 (10)         |
| Fatigue                           | 15 (50)                     | 2 (7)          | 9 (45)                                | 0              |
| Nausea                            | 14 (47)                     | 0              | 3 (15)                                | 0              |
| Hand–foot syndrome                | 8 (27)                      | 1 (3)          | 2 (10)                                | 0              |
| Hypothyroidism                    | 8 (27)                      | 0              | 5 (25)                                | 0              |
| Decreased appetite                | 10 (33)                     | 0              | 6 (30)                                | 0              |
| Weight decrease                   | 8 (27)                      | 3 (10)         | 4 (20)                                | 0              |
| Vomiting                          | 8 (27)                      | 0              | 2 (10)                                | 0              |
| Dysphonia                         | 14 (47)                     | 0              | 4 (20)                                | 0              |
| Arthralgia                        | 9 (30)                      | 2 (7)          | 2 (10)                                | 0              |
| Proteinuria                       | 9 (30)                      | 0              | 2 (10)                                | 0              |
| Headache                          | 11 (37)                     | 1 (3)          | 1 (5)                                 | 0              |

*Abbreviation:* OS overall survival

<sup>a</sup> Reported by  $\geq 25\%$  in either group.

<sup>b</sup> Excluded 6 patients who were censored  $< 24$  months in OS.
